# Supplementary material for: Mycobacterial metallophosphatase MmpE acts as a nucleomodulin to regulate host gene expression and promote intracellular survival
Source: eLife. 2026 Mar 18;14:RP108037. doi: 10.7554/eLife.108037 (PMC12999176; doi:10.7554/eLife.108037)
Supplement: Supplementary file 4. [file elife-108037-supp4.xlsx]

## Sheet: Sheet1
Plasmids used in this study
Reagent	Source	Identifier
EGPF-N1	Addgene	Cat#6085-1
MmpE-pEGFP	this study	N/A
MmpEΔNLS1-pEGFP	this study	N/A
MmpEΔNLS2-pEGFP	this study	N/A
MmpEΔNLS1-2-pEGFP	this study	N/A
MmpE-H348AN359A-pEGFP	this study	N/A
pLJR965	Addgene	Cat#115163
pLJR965-MmpE	this study	N/A
pLJR965-MmpEΔNLS1	this study	N/A
pLJR965-MmpEΔNLS2	this study	N/A
pLJR965-MmpEΔNLS1-2	this study	N/A
pLJR965-MmpE-H348AN359A	this study	N/A
pMV261	this study	N/A
pMV261-MmpE-Flag	this study	N/A
pMV261-MmpEΔNLS1-Flag	this study	N/A
pMV261-MmpEΔNLS2-Flag	this study	N/A
pMV261-MmpEΔNLS1-2-Flag	this study	N/A
pMV261-MmpE-H348AN359A-Flag	this study	N/A
MBP-MmpEΔTat	this study	N/A
MBP-MmpEΔTat/ΔNLS1-2	this study	N/A
MBP-MmpEΔTat-H348AN359A	this study	N/A
pMind-LacZ	this study	N/A
pMind-LacZ-Up800-MmpE	this study	N/A
pMind-LacZ-Up800-MmpE-Dn800	this study	N/A
