# Supplementary material for: Mycobacterial metallophosphatase MmpE acts as a nucleomodulin to regulate host gene expression and promote intracellular survival
Source: eLife. 2026 Mar 18;14:RP108037. doi: 10.7554/eLife.108037 (PMC12999176; doi:10.7554/eLife.108037)
Supplement: Supplementary file 5. [file elife-108037-supp5.xlsx]

## Sheet: Sheet1
Bacterial strains used in this study
Reagent	Source	Identifier
BCG mmpE::hyg (KommpE)	this study	N/A
BCG/pLJR965 (BCG/pLJR965)	this study	N/A
BCG mmpE::hyg/pLJR965 (ΔMmpE)	this study	N/A
BCG mmpE::hyg/pLJR965-mmpE (comp-MmpE)	this study	N/A
BCG mmpE::hyg/pLJR965-mmpEΔNLS1 (comp-MmpEΔNLS1)	this study	N/A
BCG mmpE::hyg/pLJR965-mmpEΔNLS2 (comp-MmpEΔNLS2)	this study	N/A
BCG mmpE::hyg/pLJR965-mmpEΔNLS1-2 (comp-MmpEΔNLS1-2)	this study	N/A
BCG mmpE::hyg/pLJR965-mmpE-H348AN359A (comp-MmpE-H348AN359A)	this study	N/A
BCG/pMV261	this study	N/A
BCG/pMV261-MmpE-Flag	this study	N/A
BCG/pMV261-MmpEΔNLS1-Flag	this study	N/A
BCG/pMV261-MmpEΔNLS2-Flag	this study	N/A
BCG/pMV261-MmpEΔNLS1-2-Flag	this study	N/A
BCG/pMV261-MmpE-H348AN359A-Flag	this study	N/A
DE3/MBP-MmpEΔTat	this study	N/A
DE3/MBP-MmpEΔTat/ΔNLS1-2	this study	N/A
DE3/MBP-MmpEΔTat-H348AN359A	this study	N/A
